# Supplementary material for: In vivo glucoregulation and tissue-specific glucose uptake in female Akt substrate 160 kDa knockout rats
Source: PubMed Central journal article supplement (PMC7018090; doi:10.1371/journal.pone.0223340), 2020-02-13

**Figure 1**

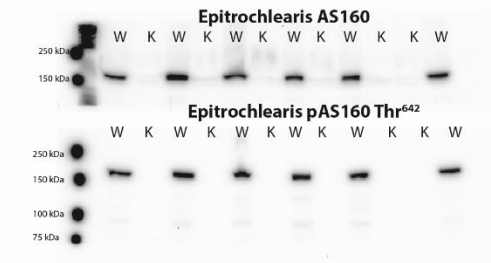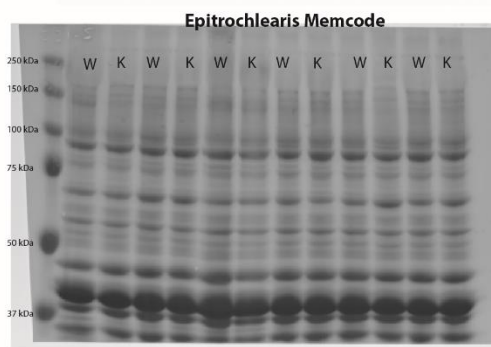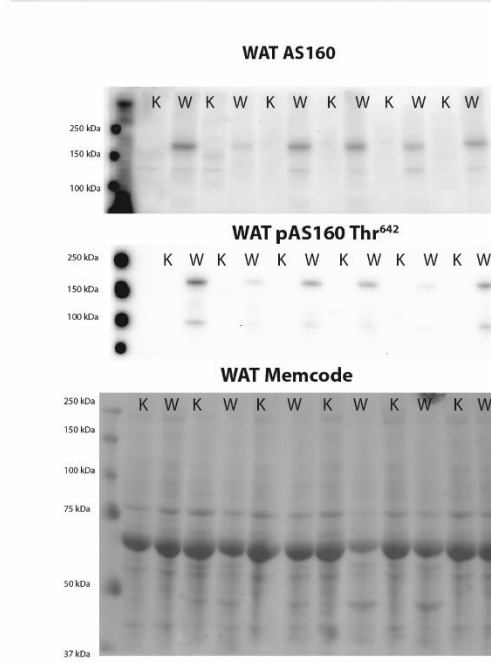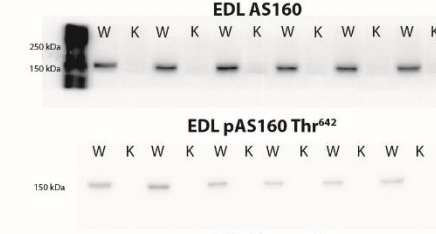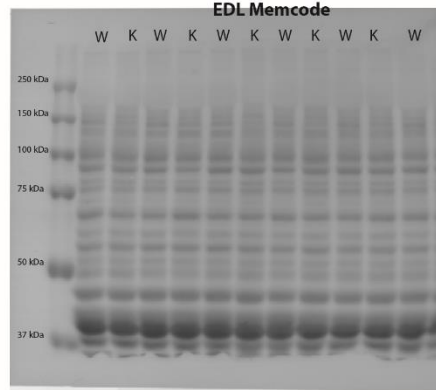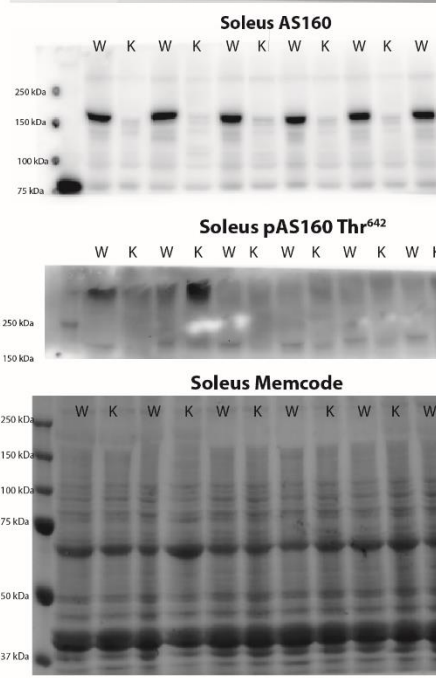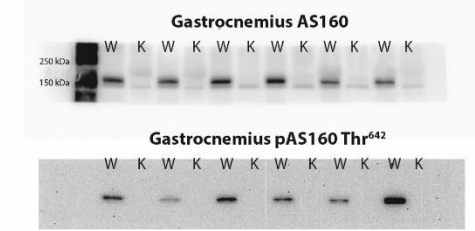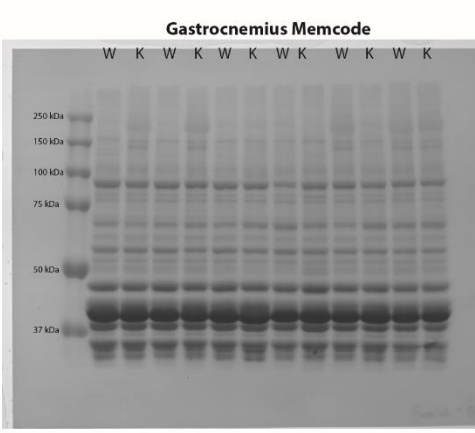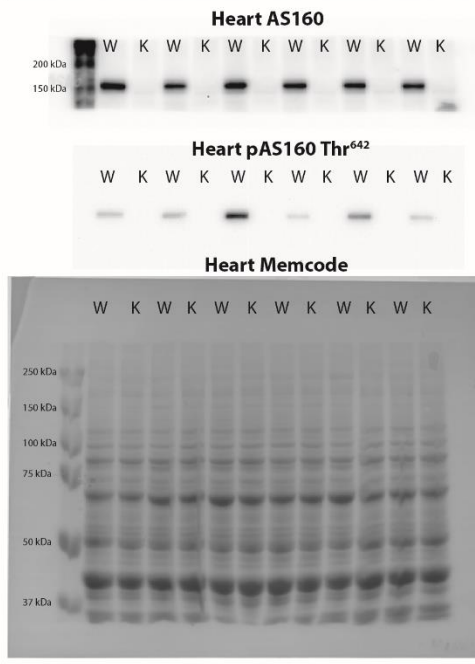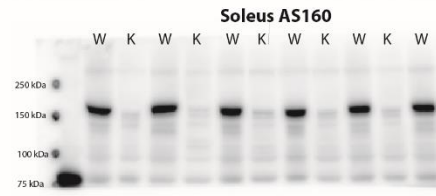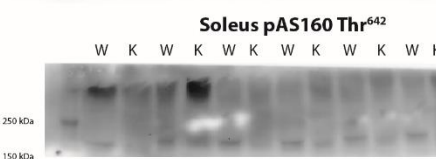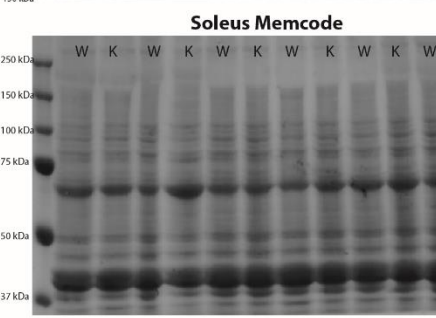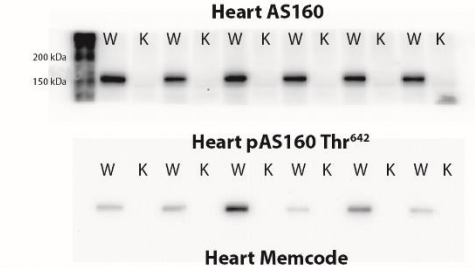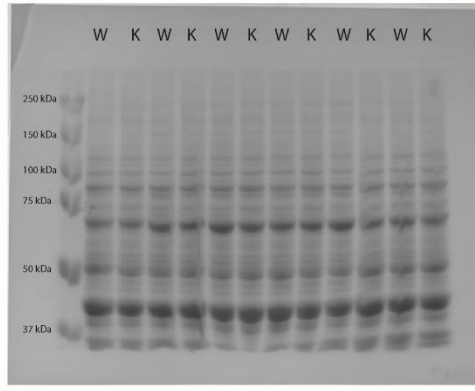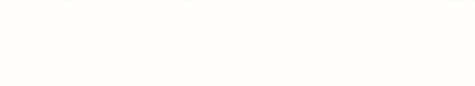

W: wild type  
K: AS160 Knock-out  
All images were captured using the Chemilluminescence channel by FluorChemE by Proteinsimple

**Figure 4 (All samples are from the hyperinsulinemic euglycemic clamp)**

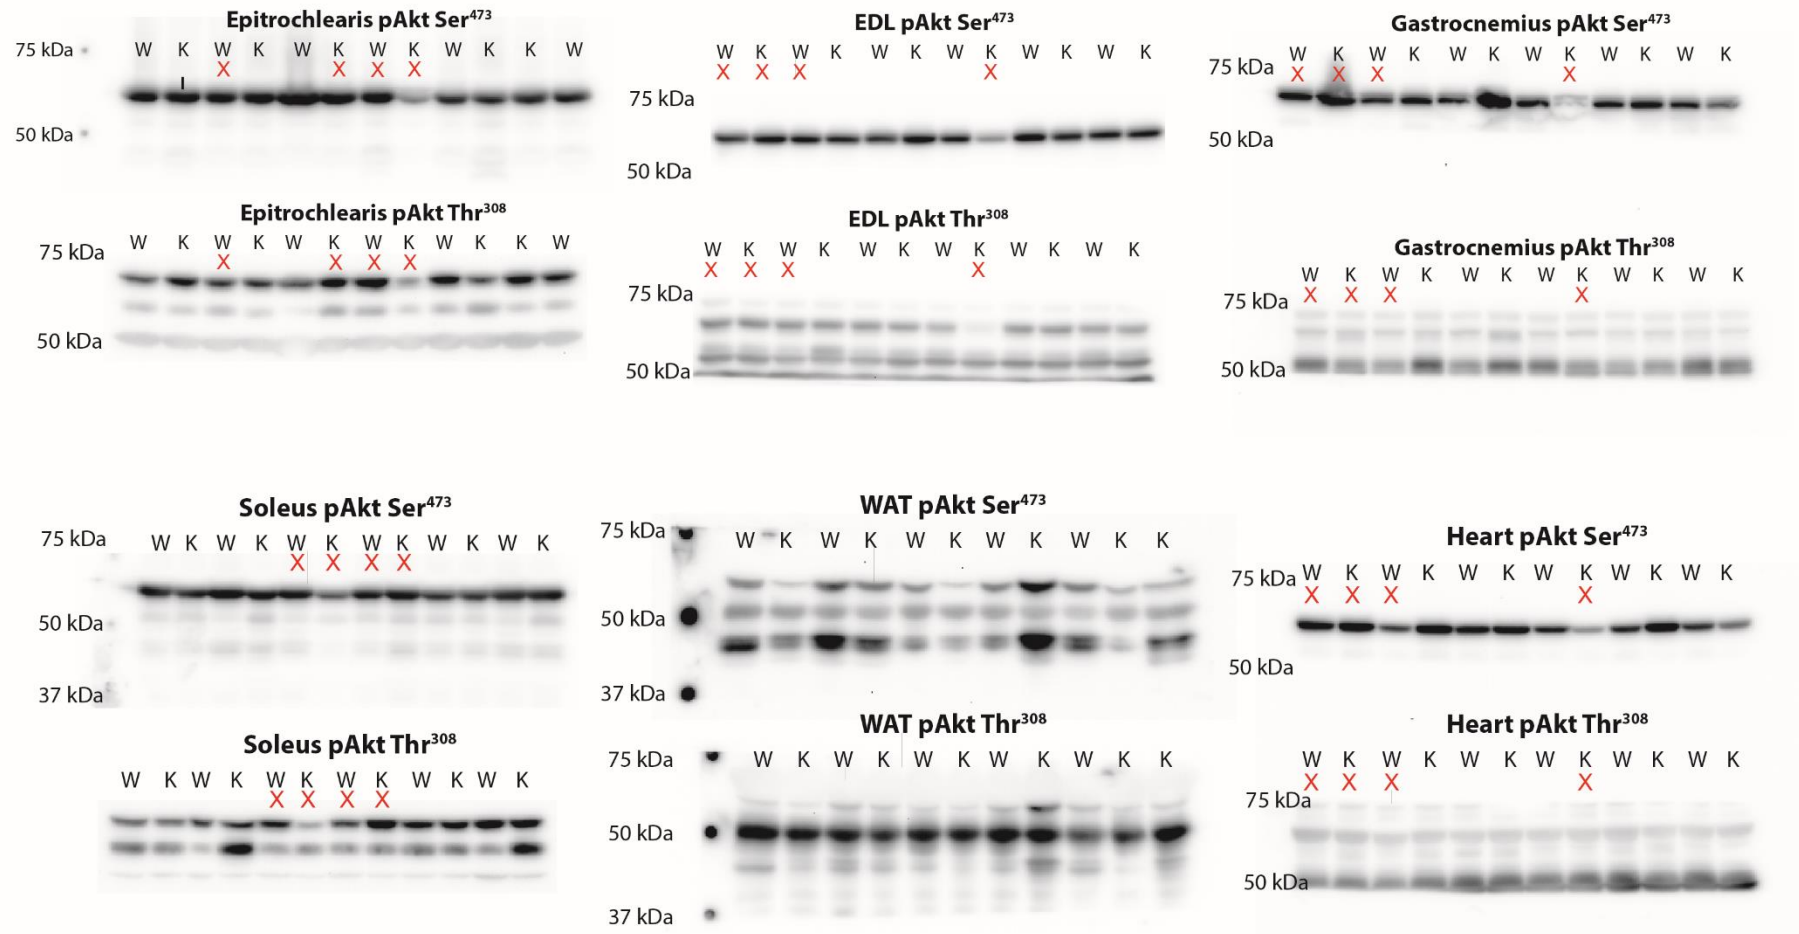

W: wild type

K: AS160 Knock-out

X: value excluded from statistical analysis because of technical problems with the hyperinsulinemic euglycemic clamp

All images were captured using the Chemiluminescence channel by FluorChemE by Proteinsimple

**Figure 5 (All samples are from the hyperinsulinemic euglycemic clamp)**

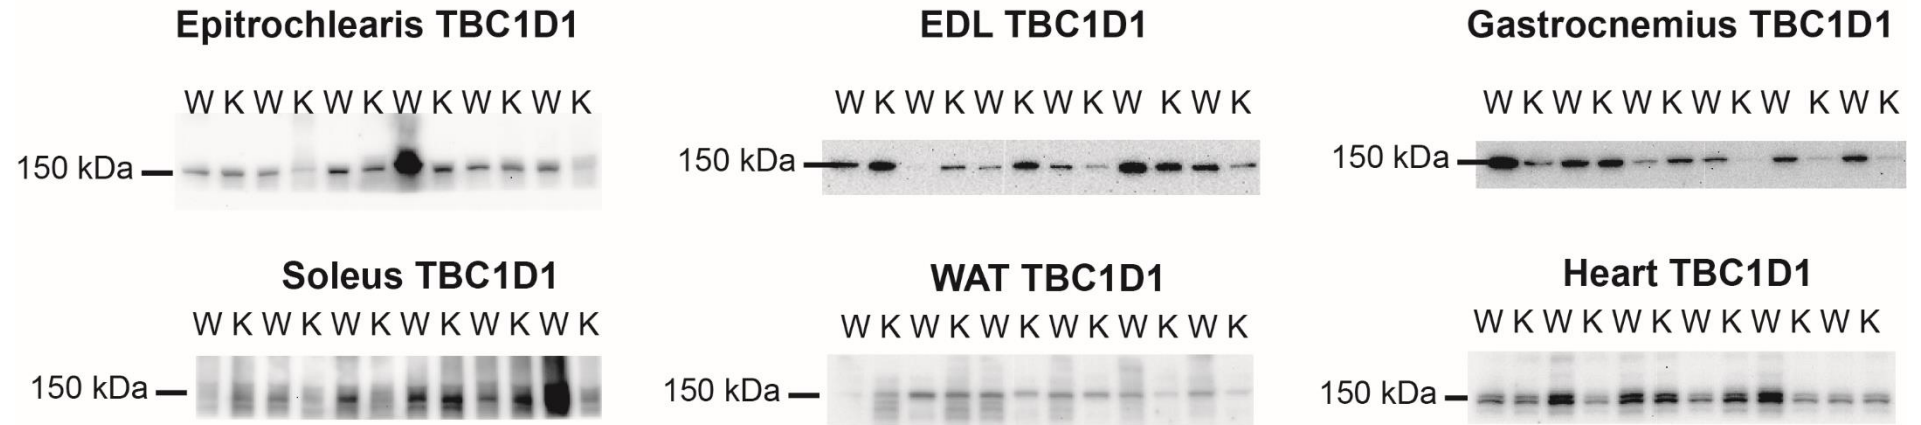

W: wild type

K: AS160 Knock-out

All images were captured using the Chemilluminescence channel by FluorChemE by Proteinsimple

**Figure 6 (All samples are from the hyperinsulinemic euglycemic clamp)**

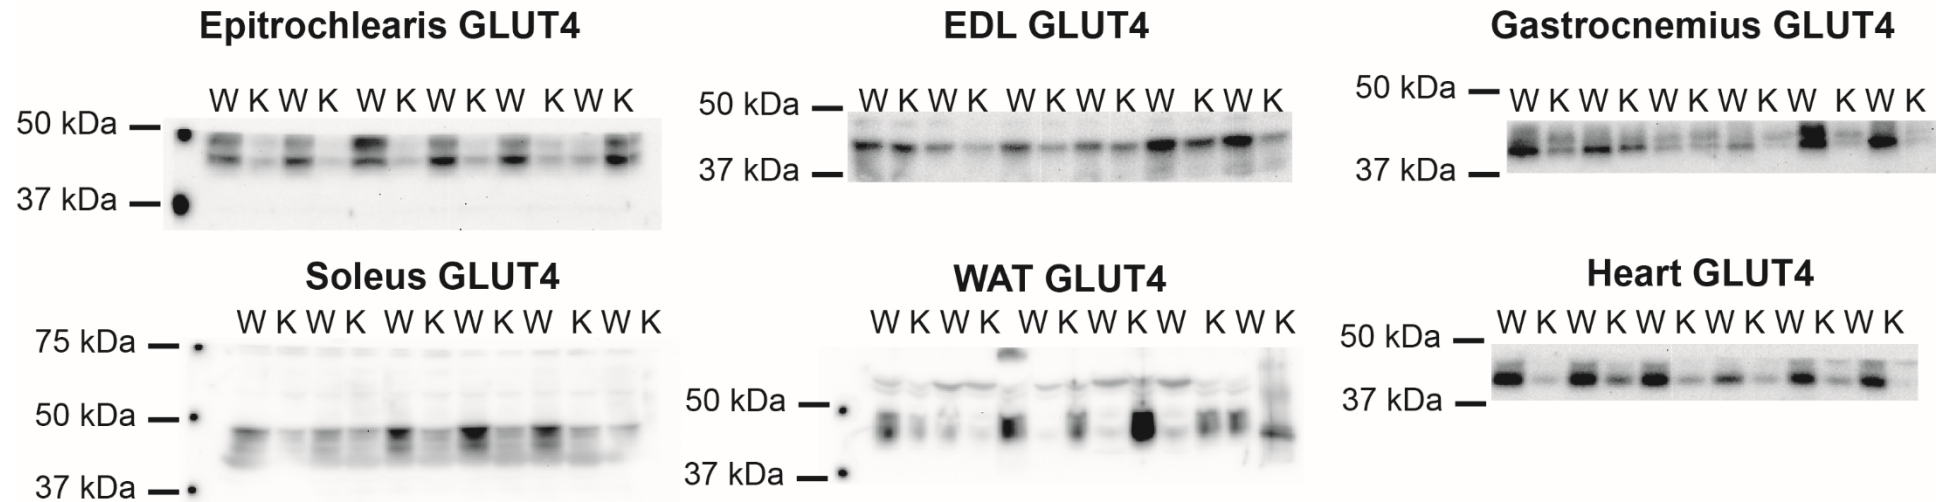

W: WT  
K: AS160 Knock-out

All images were captured using the Chemilluminescence channel by FluorChemE by Proteinsimple

**Figure 7 (All samples are from the hyperinsulinemic euglycemic clamp)**

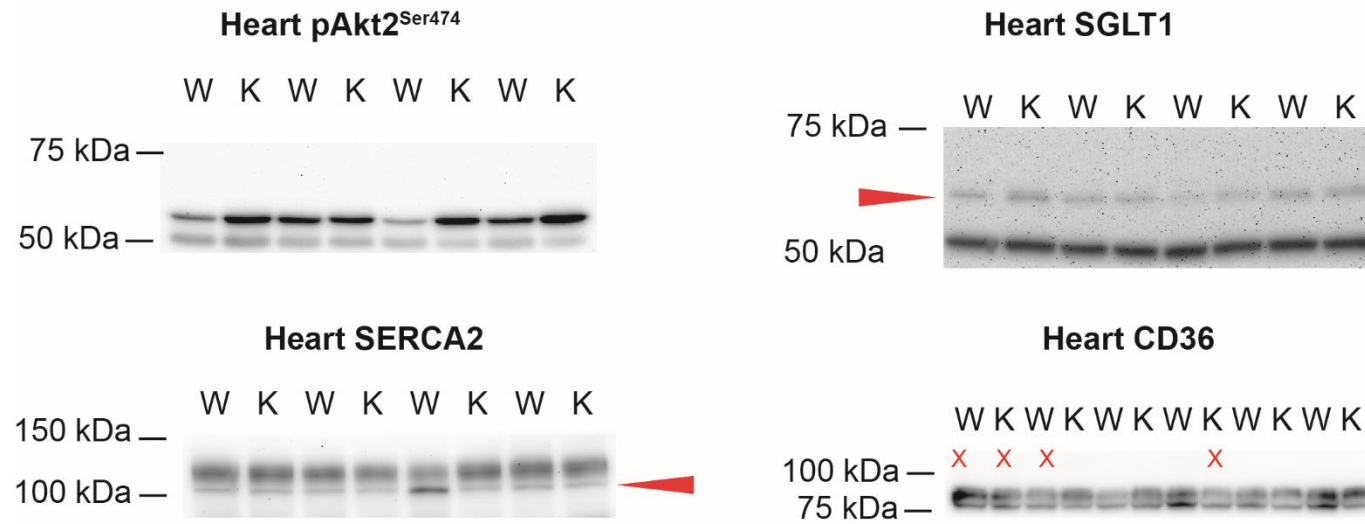

W: wild type

K: AS160 Knock-out

All images were captured under the Chemiluminescence channel by FluorChemE by Proteinsimple

X: value excluded from statistical analysis because of technical problems with the hyperinsulinemic euglycemic clamp

▶ Denotes quantified band at expected molecular weight

**Figure 8 (All samples are from the hyperinsulinemic euglycemic clamp)**

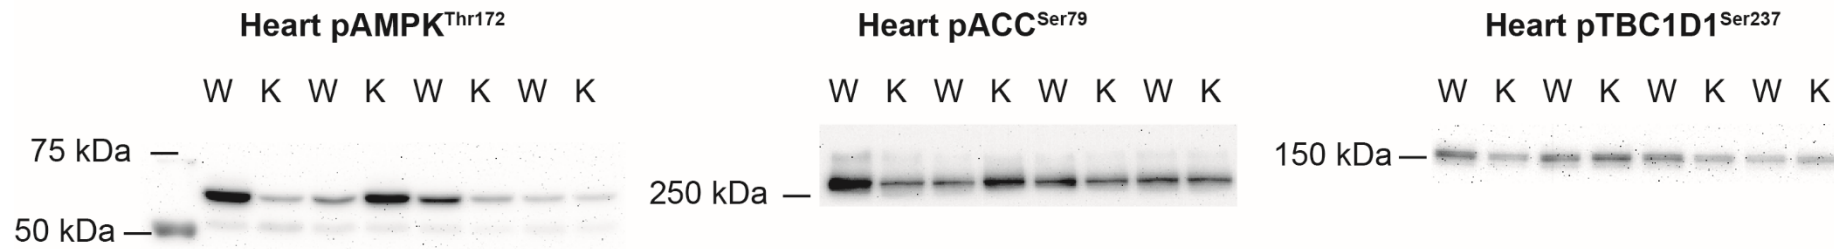

W: wild type

K: AS160 Knock-out

All images were captured using the Chemilluminescence channel by FluorChemE by Proteinsimple

**Figure 9 (All samples are from the hyperinsulinemic euglycemic clamp)**

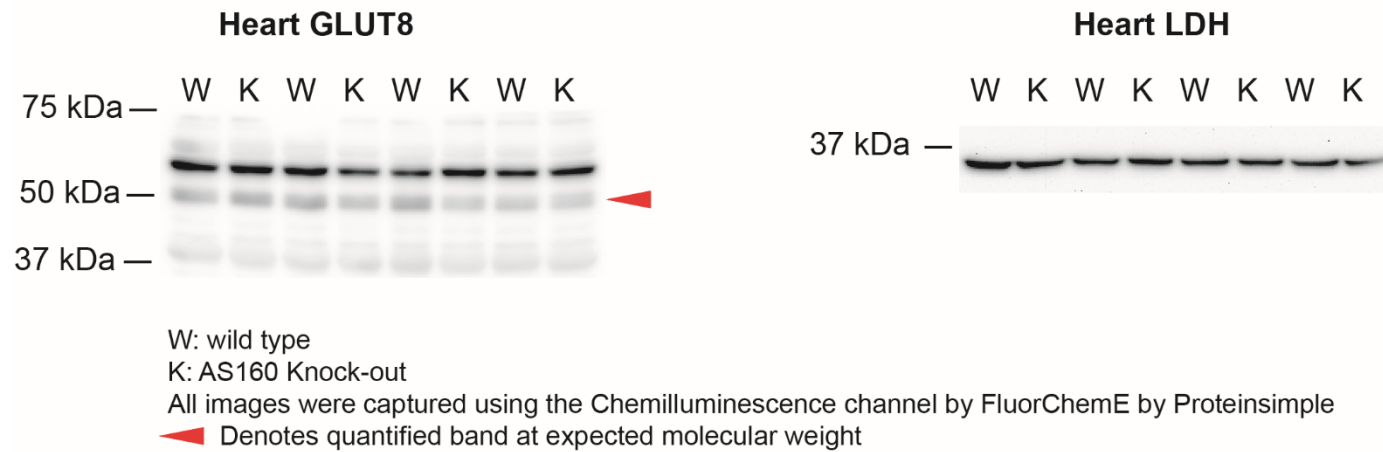

# Figure 11

## A Ex Vivo pAS160 Thr<sup>642</sup> ± Insulin

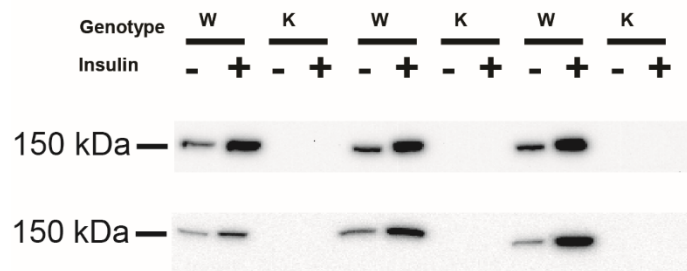

## B Ex Vivo pAS160 Thr<sup>642</sup> ± Insulin

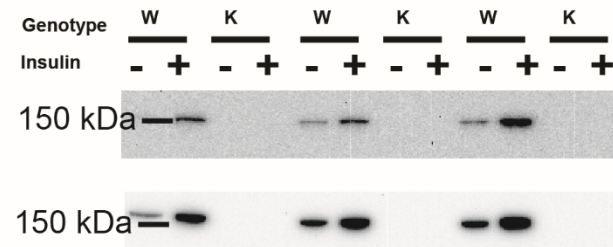

## C Ex Vivo pAkt Ser<sup>473</sup> ± Insulin

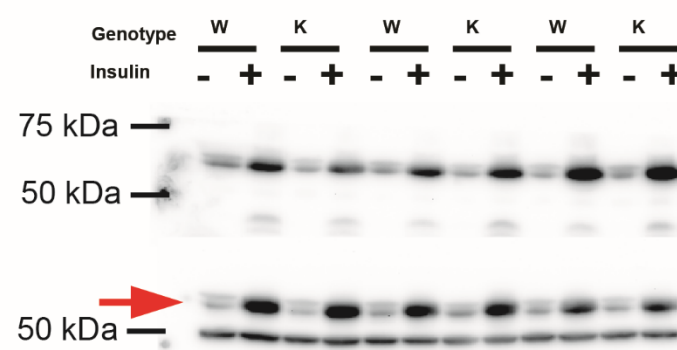

## D Ex Vivo pAkt Ser<sup>473</sup> ± Insulin

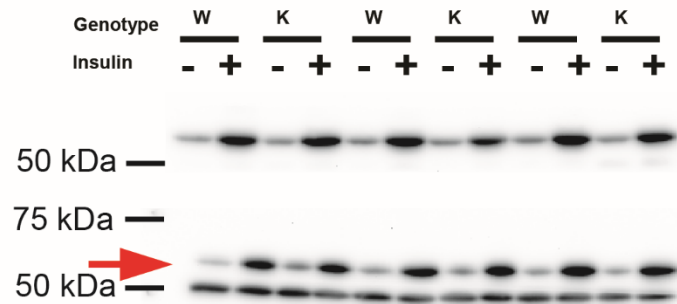

## E Ex Vivo pAkt Thr<sup>308</sup> ± Insulin

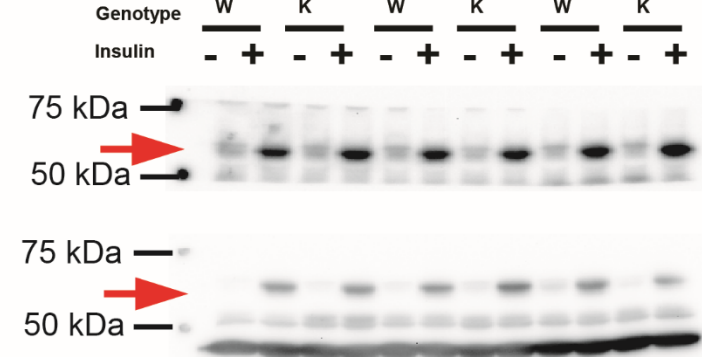

## F Ex Vivo pAkt Thr<sup>308</sup> ± Insulin

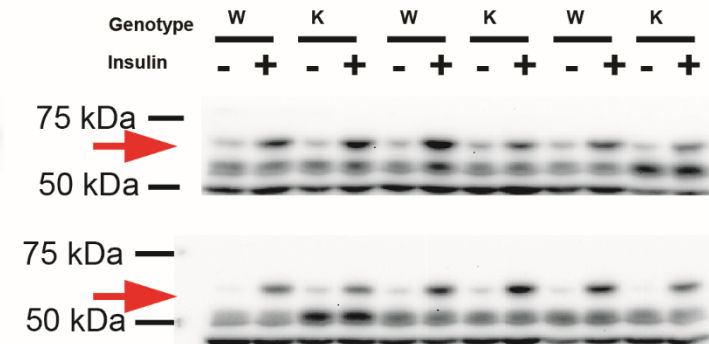

W: wild type

K: AS160 Knock-out

All images were captured using the Chemiluminescence channel by FluorChemE by Proteinsimple

➡ Denotes quantified band at expected molecular weight



**Figure 12**

**B Epitrochlearis Ex Vivo pAMPK Thr<sup>172</sup> ± AICAR**

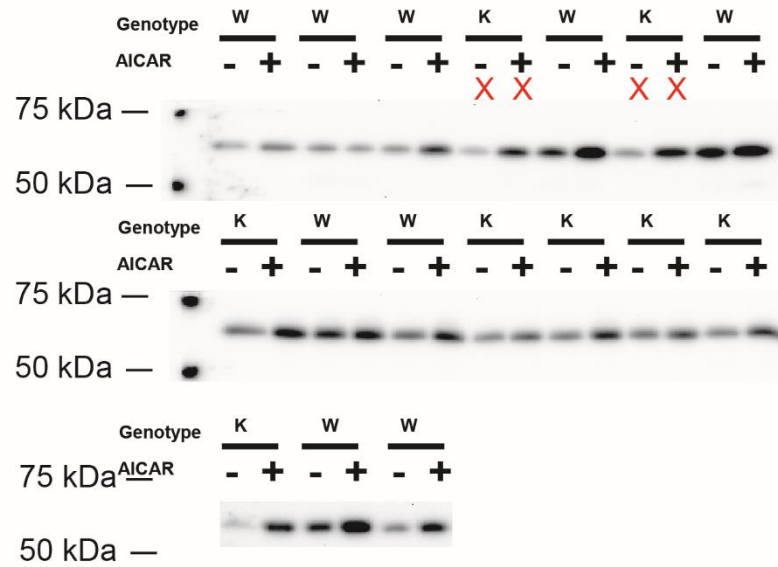

**C Epitrochlearis Ex Vivo pACC Ser<sup>79</sup> ± AICAR**

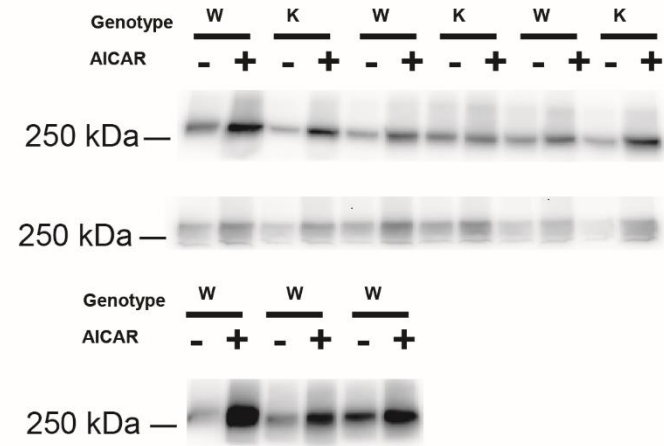

**D Epitrochlearis Ex Vivo pTBC1D1 Ser<sup>237</sup> ± AICAR**

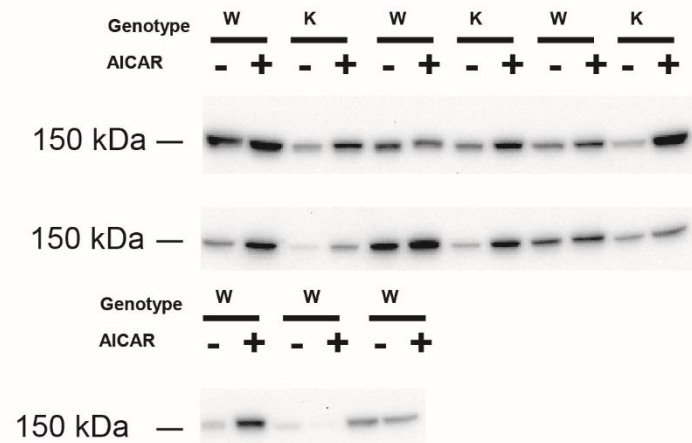

**E Epitrochlearis Ex Vivo pAS160 Thr<sup>642</sup> ± AICAR**

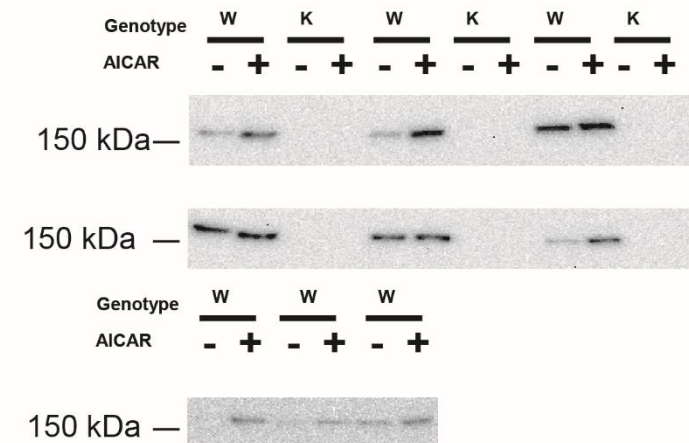

W: wild type

K: AS160 Knock-out

X: value excluded because the sample was from a male rat

All images were captured using the Chemiluminescence channel by FluorChemE by Proteinsimple

## S1(All samples are from the hyperinsulinemic euglycemic clamp)

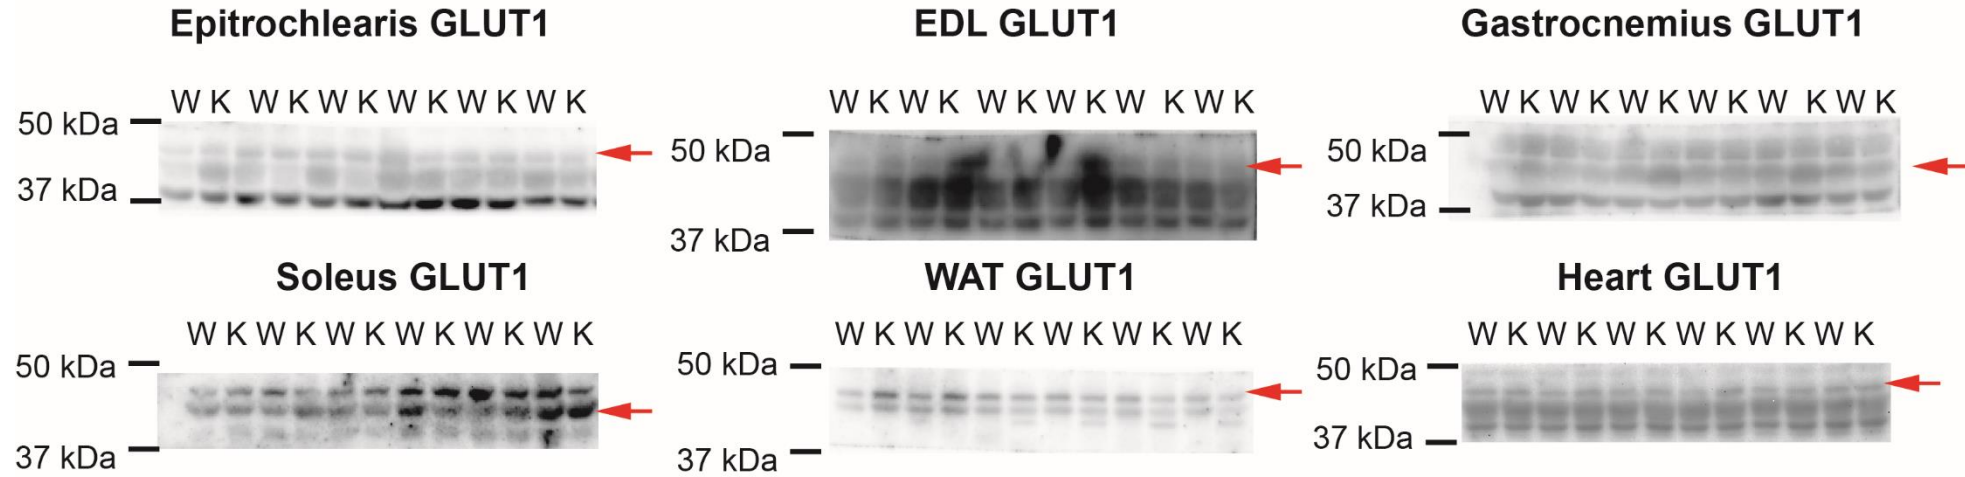

W: wild type

K: AS160 Knock-out

All images were captured using the Chemilluminescence channel by FluorChemE by Proteinsimple

← Denotes quantified band at expected molecular weight

## S2 (All samples are from the hyperinsulinemic euglycemic clamp)

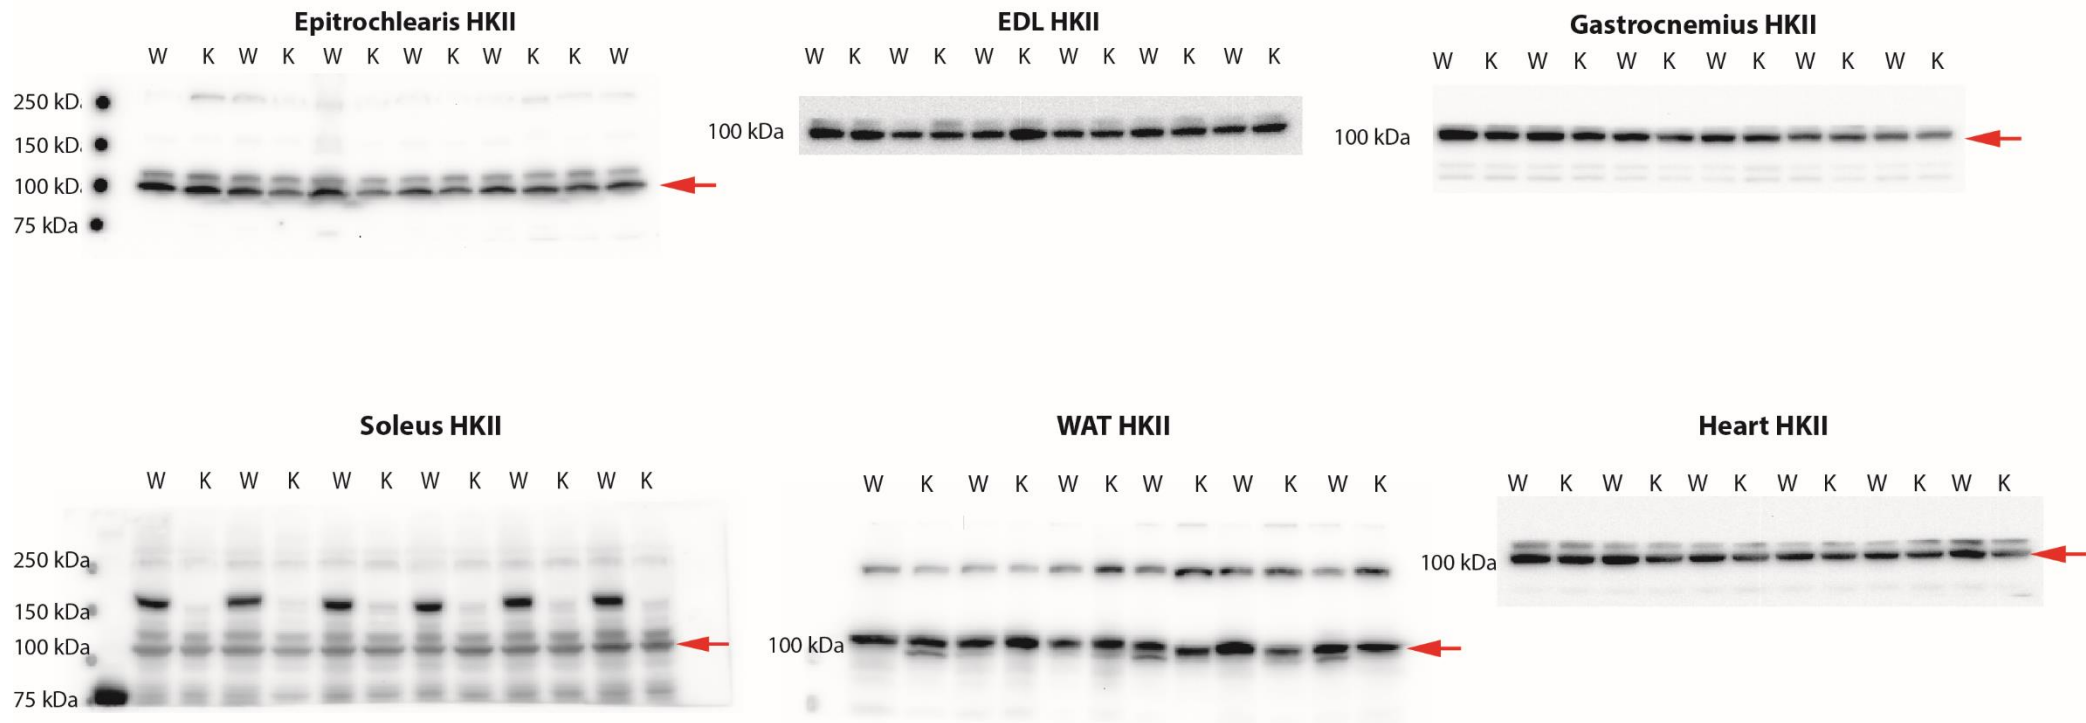

W: wild type

K: AS160 Knock-out

All images were captured using the Chemiluminescence channel by FluorChemE by Proteinsimple

← Denotes quantified band at expected molecular weight

### S3 (All samples are from the hyperinsulinemic euglycemic clamp)

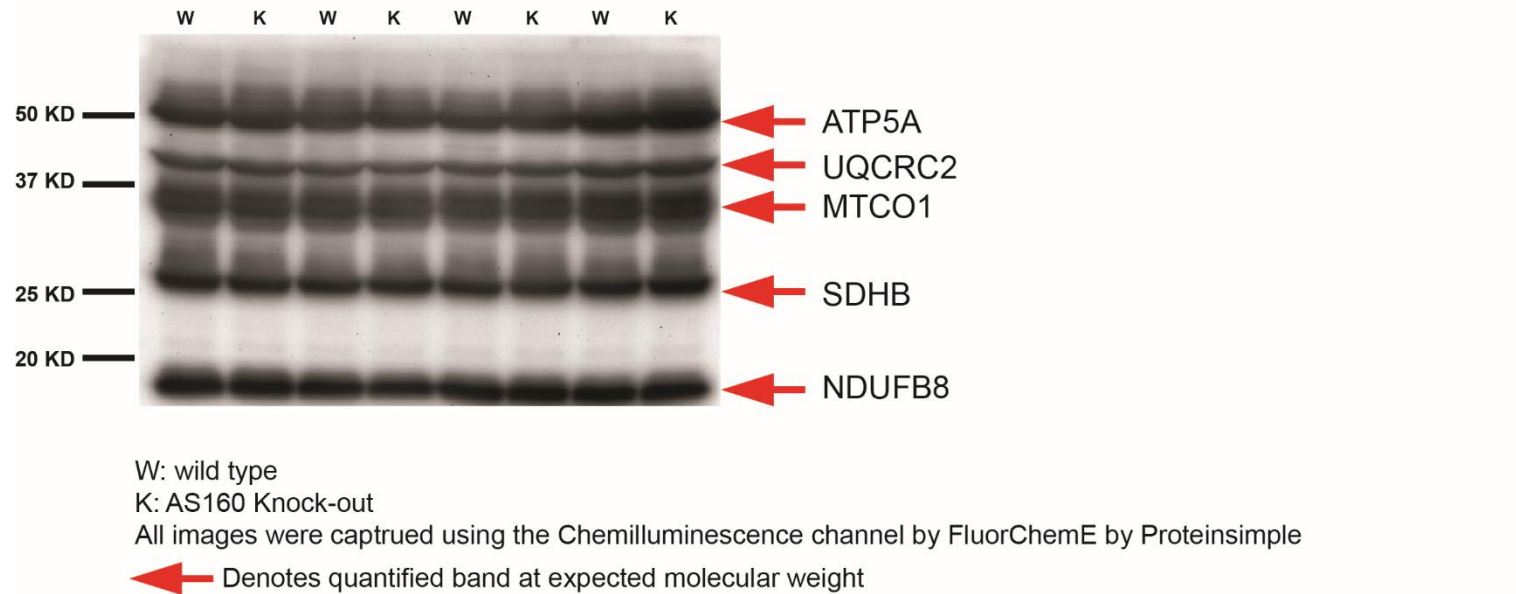

Supplement: pone.0223340.s004.pdf [file pone.0223340.s004.pdf]
