# Supplementary material for: In vivo glucoregulation and tissue-specific glucose uptake in female Akt substrate 160 kDa knockout rats
Source: PubMed Central journal article supplement (PMC7018090; doi:10.1371/journal.pone.0223340), 2020-02-13

S2 HKII in tissues collected immediately after the hyperinsulinemic-euglycemic clamp performed in WT (open bars) and KO (filled bars) rats.

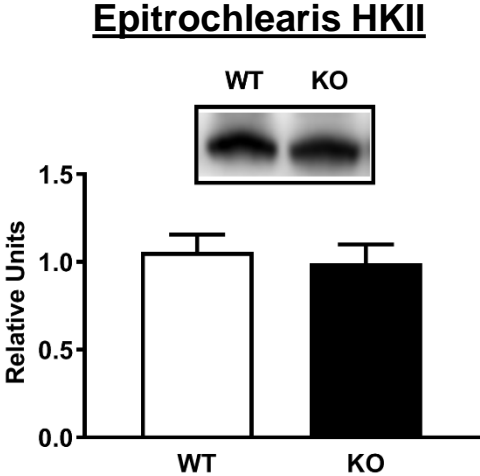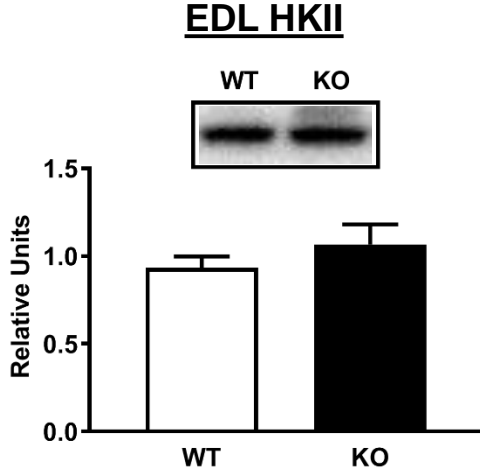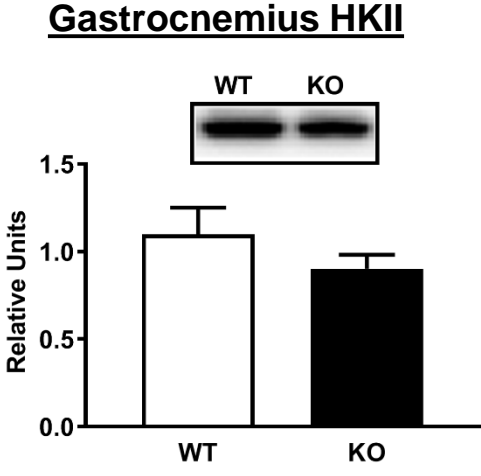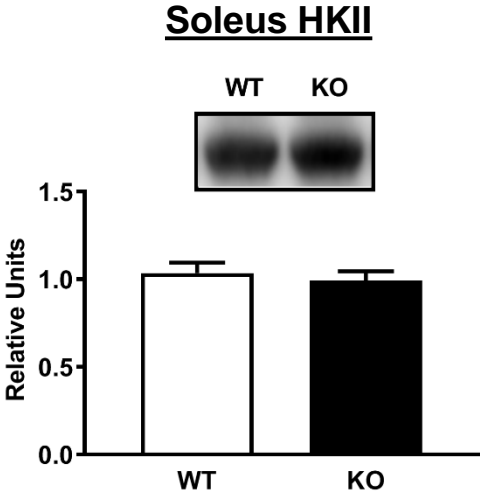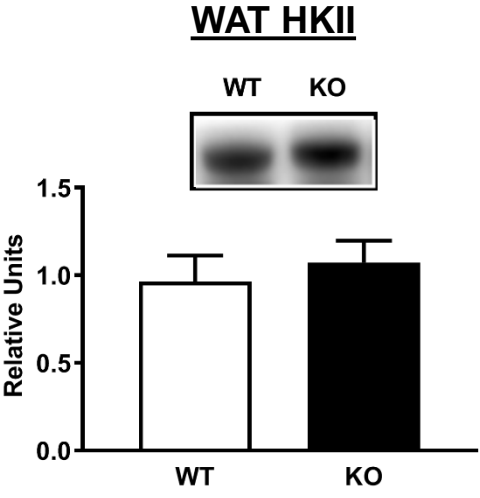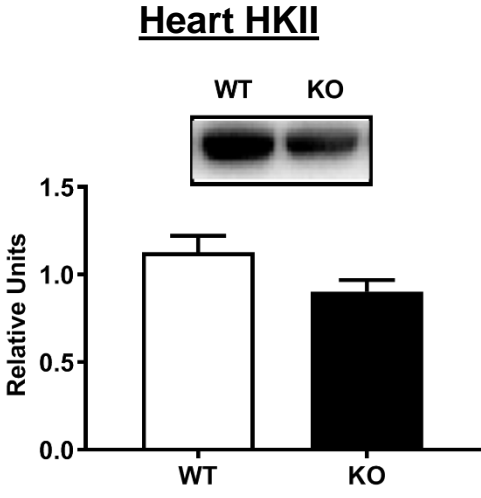

Supplement: pone.0223340.s002.pdf [file pone.0223340.s002.pdf]
